# Supplementary material for: STYK1 promotes epithelial-mesenchymal transition and tumor metastasis in human hepatocellular carcinoma through MEK/ERK and PI3K/AKT signaling
Source: PubMed Central journal article supplement (PMC5024114; doi:10.1038/srep33205), 2016-09-15
Supplement: srep33205-s1.pdf [file srep33205-s1.pdf]

# STYK1 promotes epithelial-mesenchymal transition and tumor metastasis in human hepatocellular carcinoma through MEK/ERK and PI3K/AKT

## signaling

Zhaowen Wang\*, Lei Qu\*, Biao Deng, Xing Sun, Shaohan Wu, Jianhua Liao, Junwei Fan†, Zhihai Peng†

### Supplementary Figure

Figure 1

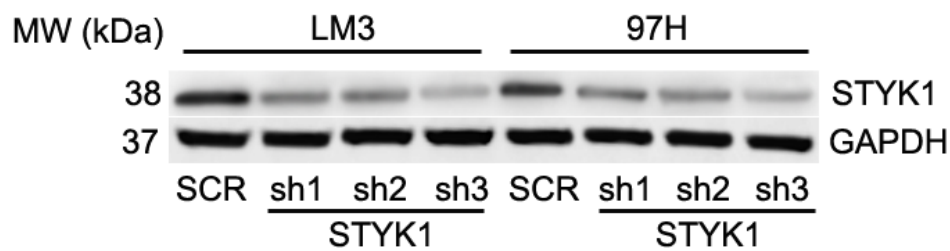

Figure 2

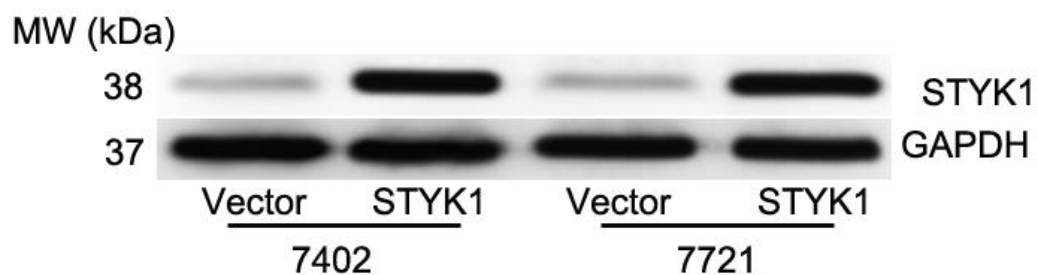

### Supplementary Figure legends

**Supplementary Figure 1.** STYK1 expression in LM3 and 97H HCC cell lines following treatment with shRNA-scramble (SCR) or shRNA-STYK1 (shSTYK1) confirmed reduced expression of STYK1 in cells treated with shSTYK1.

**Supplementary Figure 2.** STYK1 expression in BEL-7402 and SMMC-7721 HCC cells following transfection of either a control vector (Vector) or STYK1 vector (STYK1) confirmed increased levels of STYK1 in cells transfected with the STYK1 vector.
